# Supplementary material
Source: PubMed Central journal article supplement (PMC3669639)
Supplement: NIHMS442966-supplement-705_2013_1622_MOESM1_ESM.pdf [file NIHMS442966-supplement-705_2013_1622_MOESM1_ESM.pdf]

**SUPPLEMENTARY MATERIAL**

**Human metapneumovirus G protein is highly conserved within but not between genetic lineages**

**Authors and affiliations:** Chin-Fen Yang<sup>3</sup>, Chiaoyin K. Wang<sup>3</sup>, Sharon J. Tollefson<sup>1</sup>, Linda D. Lintao<sup>3</sup>, Alexis Liem<sup>3</sup>, Marla Chu<sup>3</sup>, and John V. Williams<sup>1,2</sup>.

Departments of Pediatrics<sup>1</sup> and Pathology, Microbiology and Immunology<sup>2</sup>, Vanderbilt University Medical Center, Nashville, TN.

MedImmune Vaccines, LLC<sup>3</sup>, Mountain View, CA.

**Corresponding author:**

John V. Williams, MD, Pediatric Infectious Diseases, Vanderbilt University Medical Center,  
D-7235 Medical Center North, 1161 21<sup>st</sup> Avenue South, Nashville TN 37232-2581.

Email: [john.williams@vanderbilt.edu](mailto:john.williams@vanderbilt.edu)

[Tel : \(615\) 322-2250](tel:(615)322-2250)

[Fax \(615\) 343-7659](tel:(615)343-7659)

**Supplemental Table 1.** Primers used for HMPV G gene amplification and sequencing.

| <b>First round</b>           | <b>Sequence 5'-3'</b>      | <b>Location</b> | <b>Tm (°C)</b> |
|------------------------------|----------------------------|-----------------|----------------|
| F5521 (SHF1ab)               | AAGGCGATGTCATWAAAAGTGATGG  | 5521            | 57.4           |
| R7332 (LaR1)                 | AGTCCTATGGCAACTTTTGCAGTG   | 7332            | 56.4           |
| R7332 (LbR1)                 | ACGTCTACAGCAACTTTAGCAGTG   | 7332            | 52.6           |
|                              |                            |                 |                |
| <b>Second round (nested)</b> |                            |                 |                |
| F5532 (SHaF2)                | CTAGCAGTGATGGGTCTTCAAAAAC  | 5532            | 55.3           |
| F5532 (SHbF2)                | GATCCAGTGATGGATCCTCAGAAAC  | 5532            | 56.8           |
| R7299 (LaR2)                 | AGCTGCGGTAAGGTCTTTTAAAGAG  | 7299            | 55.9           |
| R7299 (LbR2)                 | CGTACCGATAGGGTCTTTTCAAAAAG | 7299            | 56.5           |

**Supplemental figure 1.** Amino acid sequence alignment of full-length G genes from group A1 HMPV isolates. Sequences are arranged in chronological order from top to bottom. The letters indicate origin: "TN" = Tennessee; "CAN" = Canada; "NL" = Netherlands; and "JPS" = Japan. The first two digits of each isolate indicate the year. Sequences from Canada, the Netherlands and Japan obtained from GenBank as described in the text. TN sequences have been deposited in GenBank.

|            |            |             |            |            |            |            |             |             |               |             |     |
|------------|------------|-------------|------------|------------|------------|------------|-------------|-------------|---------------|-------------|-----|
|            |            |             |            |            |            |            |             |             |               |             | 100 |
| TN/82-518  | MEVKVENIRA | IDMLKARVKN  | RVARSKCFKN | ASLILIGITT | LSIALNIYLI | INYTMOENTS | ESEHHTSSSP  | MESKKTPTV   | PIDNSDTNPS    | SOHPTQOSAE  |     |
| TN/85-416  | .....      | .....       | .....      | .....      | .....      | .....      | .....       | .....       | .....         | .....       |     |
| TN/94-336  | .....T     | .....       | .....      | V.....     | .....      | .....      | .....       | .....R..... | .....T.....   | ..YS...T.   |     |
| TN/94-344  | .....T     | .....       | .....      | .....      | .....      | .....      | .....Q..... | .....R..... | .....T.....   | ..YS...T.   |     |
| TN/94-711  | .....T     | .....       | .....      | .....      | .....      | .....      | .....       | .....R..... | .....T.....   | ...S...T.   |     |
| TN/94-911  | .....T     | .V.....     | .....      | ..V.....   | .....      | ..K..K..   | .....       | .....R..... | .....T.....S. | P.....T.    |     |
| TN/95-28   | .....T     | .V.....     | .....      | ..V.....   | .....      | ..K..K..   | .....       | .....R..... | .....T.....S. | P.....T.    |     |
| TN96-12    | .....T     | .....       | .....      | .....      | .....      | .....      | .....       | .....R..... | .....         | ..Y...T.    |     |
| TN/99-46   | .....T     | .V.....     | .....      | ..V.....   | .....      | ..K..K..   | .....       | .....R..... | .....T.....S. | P.....T.    |     |
| CAN/99-81  | .....T     | .....       | .....      | .....      | .....      | .....      | K.....      | .....R..... | .....         | ..G..Y...T. |     |
| NL/00-1    | .....T     | .....       | .....      | ..V.....   | .....      | ..K..K..   | .....       | .....R..... | .....T.....S. | P.....T.    |     |
| CAN/00-13  | .....T     | .....       | .....      | .....      | .....      | .....      | .....       | .....R..... | .....         | ..G..Y...T. |     |
| JPS/03-180 | .....T     | .....       | .....      | .....      | .....      | .....      | .....       | .....R..... | ..M.....G     | ..Y...T.    |     |
|            |            |             |            |            |            |            |             |             |               |             | 200 |
| TN/82-518  | GSTLHSAASA | SSPETEPTST  | PGTTSRPPSV | DHTTTPPSAS | RRTTSPAVHT | KNNPRIGSRT | HSPSRAMTGT  | VRRTTALHTS  | STRKRPSTAS    | VQPDSSTITH  |     |
| TN/85-416  | .....      | .....       | .D.....F.  | .....      | ..K.....   | .....      | .....       | .....R..... | .....P.....   | .....T..    |     |
| TN/94-336  | ...Y.....  | .....       | .D.....F.  | .....      | ..K.....   | ..L..S...  | ..PW...R.   | .....T.R..  | .....         | .....AT..   |     |
| TN/94-344  | ...Y.....  | ..G.....    | .D.....F.  | .....      | ..K.....   | ..L..S...  | ..PW...R.   | .....T.R..  | .....         | .....AT..   |     |
| TN/94-711  | ..PY.....  | ..G.....    | .D.....F.  | .....      | ..K.....   | ..L..S...  | ..PW..KR.   | .....T.R..  | .....         | .....AT..   |     |
| TN/94-911  | ...YF....  | .....       | .D..N..F.  | .....      | ..K.....   | .....TS... | ..P..T.R.   | A...T.R..   | .....         | ...I..AT..  |     |
| TN/95-28   | ...YF....  | .....       | .D..N..F.  | .....      | ..K.....   | .....TS... | ..P..T.R.   | A...T.R..   | .....         | ...I..AT..  |     |
| TN96-12    | ...YF....  | .....       | .D.....F.  | .....      | ..K.....   | .....S...  | ..PW...R.   | .....T.R..  | ..I...S...    | .....AT..   |     |
| TN/99-46   | ...YF....  | .....       | .D..N..F.  | .....      | ..K.....   | .....TS... | ..P..T.R.   | A...T.R..   | .....         | ...I..AT..  |     |
| CAN/99-81  | ...F.....  | .....       | .D.....F.  | .....      | .....      | .....SP..  | ..PW...R.   | ..G..T.R..  | .....         | .....AT..   |     |
| NL/00-1    | ...YF....  | .....       | .D..N..F.  | .....      | ..K.....   | .....TS... | ..P..T.R.   | A...T.R..   | .....         | ...I..AT..  |     |
| CAN/00-13  | ...F.....  | .....       | .D.....F.  | .....      | .....      | ..LK.SP..  | ..PW...R.   | ..G..T.R..  | ..I.....      | .....T..    |     |
| JPS/03-180 | .....T     | .P.....     | .D.....F.  | .....      | K.....     | .....TNP.. | ..PW...R.   | ..G..T.R..  | .....         | .....AT..   |     |
|            |            |             |            |            |            |            |             |             |               |             | 230 |
| TN/82-518  | NHEETSPVSL | QTSASTTRPQ  | RKSMEASTST | TYNQTS     |            |            |             |             |               |             |     |
| TN/85-416  | .....      | .....R..... | .....      | .....      |            |            |             |             |               |             |     |
| TN/94-336  | K...A...P  | .....       | .....      | .....      |            |            |             |             |               |             |     |
| TN/94-344  | K...A...P  | .....       | .....      | .....      |            |            |             |             |               |             |     |
| TN/94-711  | K...A...P  | .....       | .....      | .....      |            |            |             |             |               |             |     |
| TN/94-911  | KN..A..A.P | .....I.     | ..V..N..   | .....      |            |            |             |             |               |             |     |
| TN/95-28   | KN..A..A.P | .....I.     | ..V..N..   | .....      |            |            |             |             |               |             |     |
| TN96-12    | K...A...P  | .....       | .....      | .....      |            |            |             |             |               |             |     |
| TN/99-46   | KN..A..A.P | .....I.     | ..V..N..   | .....      |            |            |             |             |               |             |     |
| CAN/99-81  | K...A...P  | .....A...   | ..G.....   | .....      |            |            |             |             |               |             |     |
| NL/00-1    | KN..A..A.P | .....I.     | ..V..N..   | .....      |            |            |             |             |               |             |     |
| CAN/00-13  | K...A...P  | .....A...   | ..G.....   | ..H.....   |            |            |             |             |               |             |     |
| JPS/03-180 | K...A...P  | .....A...   | ..G.....   | .....      |            |            |             |             |               |             |     |

**Supplemental figure 2.** Amino acid sequence alignment of full-length G genes from group A2 HMPV isolates. Sequences are arranged in chronological order from top to bottom. The letters indicate origin: "TN" = Tennessee; "CAN" = Canada; "NL" = Netherlands; and "JPS" = Japan. The first two digits of each isolate indicate the year. Sequences from Canada, the Netherlands and Japan obtained from GenBank as described in the text. TN sequences have been deposited in GenBank.

|           | MEVKVENIRA | IDMLKARVKN  | RVARSKCFKN  | ASLILIGITT     | LSIALNIYLI  | VNYTKQKTTTS | ESEHHTSSPP  | TESNKETSTI  | PTDNPDPINPN  | SOHQTTQOSTE |
|-----------|------------|-------------|-------------|----------------|-------------|-------------|-------------|-------------|--------------|-------------|
| TN82-79   |            |             |             |                |             |             |             |             |              |             |
| TN84-127  | .....      | .....       | .....       | .....          | .....       | I..I.....   | .....       | .....       | .....        | ..P.....    |
| TN85-57   | .....      | .....M..    | .....       | .....          | .....       | I..I.....   | .....       | .....       | .....        | ..P.....    |
| TN85-63   | .....      | .....       | .....       | .....          | .....       | I..I.....   | .....       | .....       | .....        | ..P.....    |
| TN85-115  | .....      | .....       | .....       | .....          | .....       | I..I.....   | .....       | .....       | .....        | ..P.....    |
| TN86-314  | .....      | .....       | .....       | .....          | .....       | I..I.....   | .....       | .....       | .....        | ..P...Y..   |
| TN88-59   | .....      | .....       | .....       | .....          | .....       | I..I.....   | .....N..    | .....       | S.....       | ..P.....    |
| TN91-1292 | .....      | .....       | .....       | .....          | .....M..... | .....I..... | .....       | .....       | .....T..     | ..P.....    |
| TN92-250  | .....      | .....       | .....       | .....          | .....       | I..I..N..   | .....       | .....A..    | S.....       | ..P.....    |
| TN92-313  | .....      | .....K..    | .....       | .....          | .....       | I..I..I..   | .....       | .....       | .....T..     | ..P.....    |
| TN92-357  | .....      | .....       | .....       | .....          | .....       | I..I.....   | .....       | .....A..    | S.....       | ..P.....    |
| TN92-361  | .....      | .....       | .....       | .....          | .....       | I..I.....   | .....A..... | .....       | .....        | ..P.....    |
| TN92-396  | .....      | .....       | .....       | .....          | .....       | I..I..N..   | .....       | .....A..    | S.....       | ..P.....    |
| TN92-435  | .....      | .....F..... | .....       | .....          | .....       | .....I..... | .....       | .....       | .....T..     | ..P.....    |
| TN94-49   | .....      | .....V..... | .....R..... | .....          | .....       | .....I..... | .....       | .....       | .....        | ..P.....    |
| TN94-66   | .....      | .....       | .....       | .....          | .....       | I..I.....   | .....       | .....       | .....I..N... | ..LP.....   |
| TN94-616  | .....      | .....       | .....       | .....          | .....       | I..I.....   | .....       | .....A..    | S.....       | ..P.....    |
| TN95-354  | .....      | .....       | .....       | .....          | .....       | I..I.....   | .....       | .....       | .....SI..... | ..P.....    |
| CAN97-83  | .....      | .....       | .....       | .....          | .....       | I..I..S..   | .....       | .....A..    | S.....       | ..P.....    |
| TN00-31   | .....      | .....       | .....       | .....          | .....       | I..I.....   | .....       | .....A..    | S.....       | ..P.....    |
| TN00-43   | .....      | .....       | .....       | .....          | .....       | I..M.....   | .....       | .....A..    | S.....       | ..P.....    |
| NL00-17   | .....      | .....       | .....       | .....          | .....       | I..I.....   | .....       | .....P..A.. | S.....S      | ..P.....    |
| CAN00-16  | .....      | .....       | .....       | .....P..T..... | .....H..    | I..I.....   | .....       | .....A..    | S.....       | ..P.....    |
| JPS03-178 | .....      | .....       | .....       | .....          | .....       | I..I.....   | .....G..... | .....       | .....SI..... | ..P...P..   |

|           |            |            |            |             |             |            |           |            |            |           |
|-----------|------------|------------|------------|-------------|-------------|------------|-----------|------------|------------|-----------|
| TN82-79   | SPTLNPAASV | SPSETEPAST | PDTNRLSSV  | DRSTTOPSES  | RTKTKPTVHT  | KNNPSTVSRT | QSPLRATKA | VLRATAFRTS | STGKRPTTTS | VQSDSSTTQ |
| TN84-127  | .....T.P.  | .SP..G.T.. | .....      | .....A.     | .....S..... | .....      | ..QP..... | .H.....    | .....      | .....     |
| TN85-57   | .....T...  | .SL..G.... | .....      | .....A.     | .....S..... | .....      | ..QP..... | .H.....    | .....      | .....     |
| TN85-63   | .....      | .....      | S.....     | .....A.     | .....       | .....      | ..L.....  | .H.T.....  | .....      | .....     |
| TN85-115  | .....      | .....      | S.....     | .....A.     | .....       | .....      | .....     | .H.T.....  | .....      | .....     |
| TN86-314  | .....      | .....      | S.....     | .....A.     | .....       | .....      | .....     | .H.T.....  | .....      | .....     |
| TN88-59   | .L.P.ST... | .....D..L. | .....      | .....I..... | .....I..... | .....      | ..PL..... | A.....L... | ..ES.....  | .....     |
| TN91-1292 | .....T...A | .....      | .....A     | .....       | .....       | N....A...  | ..P.T.... | ...T..LH.. | .....      | .....     |
| TN92-250  | N....T...  | .....      | .....      | ..A.....    | .....       | R....A...  | .....     | I.....M.   | .....L     | .....     |
| TN92-313  | .L.....T.. | .....      | .....      | .....       | ..R.....K   | ..I...P..  | ..P...T.  | ....SL...  | ..E.....   | .....     |
| TN92-357  | N.....     | .....      | .....      | ..A.....    | .....       | R....A...  | .....E.   | .....N     | .....      | .....     |
| TN92-361  | ..S.S.T.P. | ..P..G.... | .....      | .....T.     | .....S..... | ..G.....   | ..QP..... | .H.T.....  | I..N.....  | .....     |
| TN92-396  | N...S.T... | .....      | .....      | ..A.....    | .....       | R....A...  | .....     | I.....I.   | .....L     | .....     |
| TN92-435  | .....T.... | .....      | .....A     | .....       | .....       | N....A...  | ..PL..... | .P.T...H.  | .P.....    | .....     |
| TN94-49   | .....T...A | ..P.....   | .....A     | .....       | .....L...   | .....A...  | ..P.....  | .P...LH..  | .....      | .....     |
| TN94-66   | .L.....    | .....      | .....      | .....       | .....L..K   | ..I.....   | ..T.....  | .....      | ..E.....   | .....     |
| TN94-616  | N....T...  | .....      | .....A     | ..A.....    | .....       | R....A...  | .....E    | IP...L.M.  | .....A.    | .....     |
| TN95-354  | .....      | .....      | S...S.P..A | .....       | ..AR.....K  | ..I.....   | ..P.....  | .....      | ..EG.....  | .....     |
| CAN97-83  | N.....     | .....      | .....      | ..A.....    | .....       | R....A.S.  | ..P.....  | IR...T..M. | .....      | .....     |
| TN00-31   | N.....     | .....      | .....      | ..A.....    | .....       | R....A.S.  | ..T.V.... | I...V..M.  | .....L     | .....     |
| TN00-43   | N.....     | .....T..   | ...S.....  | ..A.....    | ...N.....   | R....A.S.  | ..PQ..... | IP.....    | .....L     | .....     |
| NL00-17   | N.....A    | .....      | .....      | ..A.....    | .....       | I...N.A.S. | ..P.T.... | IR...T..M. | .....L     | .....     |
| CAN00-16  | N.....V.T  | .....T..   | .....      | ..A.....    | .....S..... | R....A.S.  | ..P.....  | IR...T..M. | ..E.....L  | ..Y.....  |
| JPS03-178 | .L..Y..S.. | .S.....    | .GI.....   | .....K.     | ..N.T...K   | R.I.....K  | ..PWT.A.. | .P...T.... | ..E.....   | ..N.....  |

|           |            |             |            |         |
|-----------|------------|-------------|------------|---------|
| TN82-79   | NHEETSSANP | QASASTMQ--  | -----TSTPT | I*----- |
| TN84-127  | .....      | .....I..PQ  | RKSIE..... | ..----- |
| TN85-57   | .....      | .....I..PQ  | RKSIE..... | ..----- |
| TN85-63   | .....      | .E.....     | -----      | -----   |
| TN85-115  | .....      | .E.....     | -----      | -----   |
| TN86-314  | .....      | .E.....     | -----      | -----   |
| TN88-59   | .....      | .....V.--   | -----      | .QS.--  |
| TN91-1292 | .....S..   | .....       | -----R.S.  | .Q.K.-- |
| TN92-250  | .....G.... | .....       | -----      | -----   |
| TN92-313  | .....      | .....       | -----L.    | .....   |
| TN92-357  | .....G.... | .....       | -----      | -----   |
| TN92-361  | .....      | ...T..I.PQ  | RKSIE..I.. | ..----- |
| TN92-396  | .....G.... | .....       | -----      | -----   |
| TN92-435  | .....S..   | .....       | -----R...  | .Q.K.-- |
| TN94-49   | .....PS..  | .....       | -----R...  | .Q.K.-- |
| TN94-66   | .....G.... | .....*      | -----      | -----   |
| TN94-616  | .....G.... | .....       | -----      | -----   |
| TN95-354  | .....G.... | .....       | -----      | LQ....  |
| CAN97-83  | .....G.... | .....V..... | -----      | -----   |
| TN00-31   | .....G.... | .....       | -----      | -----   |
| TN00-43   | .....D.... | .....       | -----      | -----   |
| NL00-17   | .....G.... | .....       | -----I     | .....   |
| CAN00-16  | .....G.... | ...V...*    | -----      | .....S* |
| JPS03-178 | .....G.... | .....N..... | -----      | -----   |

**Supplemental figure 3.** Amino acid sequence alignment of full-length G genes from group B1 HMPV isolates. Sequences are arranged in chronological order from top to bottom. The letters indicate origin: "TN" = Tennessee; "CAN" = Canada; "NL" = Netherlands; and "JPS" = Japan. The first two digits of each isolate indicate the year. Sequences from Canada, the Netherlands and Japan obtained from GenBank as described in the text. TN sequences have been deposited in GenBank.

|            |            |             |             |            |            |            |            |            |            |            |     |
|------------|------------|-------------|-------------|------------|------------|------------|------------|------------|------------|------------|-----|
|            |            |             |             |            |            |            |            |            |            |            | 100 |
| TN/87-27   | MEVRVENIRA | IDMFKAKIKN  | RTRNSRCYRN  | ATLILIGLTA | XSMALNIFLI | IDHATLKNMI | KTENCANMPS | AEPSKKTLMT | STAGPNTKPN | PQOATQWTT  | E   |
| TN/88-421  | .....      | .....       | .I.....     | .....      | L.....     | .....      | .....      | .....      | .....      | .....      |     |
| TN/89-113  | .....      | .....       | .I.S.....   | .....      | L.....     | .....R...  | .....      | .....P..   | .....      | .....      |     |
| TN/89-420  | .....      | .....       | .I.S.....   | .....      | L.....     | .....R...  | .....      | .....P..   | .....      | .....      |     |
| TN/89-713  | .....      | .....       | .I.S.....   | .....      | L.....     | .....R...  | .....      | .....P..   | .....      | .....      |     |
| TN/94-11   | .....      | .....       | .I.S.....   | .....      | L.....     | .....      | .....      | .....P..   | .....      | .....      |     |
| TN/94-137  | .....      | .....       | .I.S.....   | .....      | L.....     | .....      | .....      | .....P..   | .....      | .....      |     |
| CAN/97-82  | .....      | .....T..    | .I.S.....   | .....      | L.....     | .....R...  | .....P     | .....Q..   | .....      | .....      |     |
| TN/97-235  | .....      | .....       | .I.S.....   | .....      | L.....     | .....R...  | .....      | .....P..   | .....      | .....      |     |
| TN/97-237  | .....      | .....       | .I.S.....   | .....      | L.....     | .....R...  | .....      | .....P..   | .....      | .....      |     |
| TN/98-242  | .....      | .....       | .I.S.....   | .....      | L.....     | .....      | .....      | .....R...S | .....D     | .....      |     |
| NL/99-1    | .....      | .....       | .I.S.....   | .....      | L.....     | .....R...  | .....      | .....P..   | .....      | .....      |     |
| JPS/02-76  | .....      | .....       | .IKS.....   | .....      | L.....     | .....R...  | .....L.    | .....P..   | .....S..   | .....      |     |
| JPS/03-194 | .....      | .....       | .I.S.....   | .....      | L.....     | .....R...  | .....      | .....P..   | .....S..   | .....      |     |
|            |            |             |             |            |            |            |            |            |            |            | 200 |
| TN/87-27   | NSTSPAATSG | GYLYIGTTPT  | PDTTAPQQTP  | DKHTALLKST | NEQITQTTTE | KKTTRATTKK | GKKGKENTNQ | TTSTAATQTT | NTTNQIRNVS | ETTTTSARPR |     |
| TN/88-421  | .....      | .....T....  | .....       | .....      | .....      | .....I...  | .....      | .....      | .....L.... | .....      |     |
| TN/89-113  | .....V..PE | .HP.T..Q.   | S.....T     | ...P.P...  | .....      | ...I...Q.  | RE.....    | .....      | .....A..   | ..I...D... |     |
| TN/89-420  | .....V..PE | .HP.T..Q.   | S.....T     | ...P.P...  | .....      | ...I...Q.  | RE.....    | .....      | .....A..   | ..I...D... |     |
| TN/89-713  | .....V..PE | .HP.T..Q.   | S.....T     | ...P.P...  | .....      | ...I...Q.  | RE.....    | .....      | .....A..   | ..I...D... |     |
| TN/94-11   | .....V..E  | .H..T..Q.   | .....T      | ...TPQ...  | .....      | .....Q.    | E.....     | .....      | .....A..   | ..I...D... |     |
| TN/94-137  | .....V..E  | .H..T..Q.   | .....T      | ...TPQ...  | .....      | .....Q.    | E.....     | .....      | .....A..   | ..I...D... |     |
| CAN/97-82  | .....PE    | .HP.TE.Q.   | .....T      | ...P...    | .....      | .....Q.    | RE.....    | .....      | .....A..   | ..I...D... |     |
| TN/97-235  | .....PE    | .H..T..Q.   | .....T      | ...P...    | .....      | .....Q.    | RE.....    | .....      | .....A..   | ..I...D... |     |
| TN/97-237  | .....PE    | .H..T..Q.   | .....T      | ...P...    | .....      | .....Q.    | RE.....    | .....      | .....A..   | ..I...D... |     |
| TN/98-242  | ...L...E   | ...T..IQ.   | .....T      | ..Y.....   | .....      | ...A.Q.    | .....      | .....      | ...T..AN   | ..I...D... |     |
| NL/99-1    | .....V..PE | .HP.T..Q.   | S.....T     | ...P...    | .....      | ...I...Q.  | RE.....    | .....      | .....A..   | ..I...D... |     |
| JPS/02-76  | .....LE    | .HP.TE.Q.   | .....T      | ...P...    | .....      | .....Q.    | RE.....    | .....      | .....A..   | ..I...D... |     |
| JPS/03-194 | .....LE    | .HP.T..Q.   | .....T      | ...P...    | .....      | .....Q.    | R.....     | .....      | .....A..   | ..I...D... |     |
|            |            |             |             |            |            |            |            |            |            |            | 240 |
| TN/87-27   | IDTTTOSSEQ | TTQATDSSSL  | PHHAORGAKP  | K-----     | ----       |            |            |            |            |            |     |
| TN/88-421  | T.....     | .....       | ..Y..S...   | -----      | ----       |            |            |            |            |            |     |
| TN/89-113  | T.....     | ..R...P..P  | -----       | -----      | ----       |            |            |            |            |            |     |
| TN/89-420  | T.....     | ..R...P..P  | -----       | -----      | ----       |            |            |            |            |            |     |
| TN/89-713  | T.....     | ..R...P..P  | -----       | -----      | ----       |            |            |            |            |            |     |
| TN/94-11   | T.....     | ..R...P...  | ..Y.....L   | -----      | ----       |            |            |            |            |            |     |
| TN/94-137  | T.....     | ..R...P...  | ..Y.....L   | -----      | ----       |            |            |            |            |            |     |
| CAN/97-82  | T.....R..  | .....NP..P  | .....S...   | *-----     | ----       |            |            |            |            |            |     |
| TN/97-235  | T.S.....   | ..R...A..P  | ..Y.....L   | -----      | ----       |            |            |            |            |            |     |
| TN/97-237  | T.S.....   | ..R...A..P  | ..Y.....L   | -----      | ----       |            |            |            |            |            |     |
| TN/98-242  | T.I.....   | ...T...P..P | ..Y.....QL  | .QTQHTNIPS | K*--       |            |            |            |            |            |     |
| NL/99-1    | T.....     | ..R...P..P  | -----       | -----      | ----       |            |            |            |            |            |     |
| JPS/02-76  | T.I.....   | ..R...EPG.P | ...R.D.G.   | R*-----    | ----       |            |            |            |            |            |     |
| JPS/03-194 | .....      | ..R...EPG.S | ..Y..R...G. | R*-----    | ----       |            |            |            |            |            |     |

**Supplemental figure 4.** Amino acid sequence alignment of full-length G genes from group B2 HMPV isolates. Sequences are arranged in chronological order from top to bottom. The letters indicate origin: "TN" = Tennessee; "CAN" = Canada; "NL" = Netherlands; and "JPS" = Japan. The first two digits of each isolate indicate the year. Sequences from Canada, the Netherlands and Japan obtained from GenBank as described in the text. TN sequences have been deposited in GenBank.

100

| TN/82-59   | MEVRVENIRA | IDMFKAKIKN | RIRSSKCYRN | ATLILIGLTA | LSMALNIFLI | INHATLKNMT  | KAHECANMPP  | AEPSKKTGMT | STVDSNTKPN  | SQQATQWTE   |
|------------|------------|------------|------------|------------|------------|-------------|-------------|------------|-------------|-------------|
| TN/83-126  | .....      | L.....     | .....      | .....      | .....      | .D.....     | .....       | ....T..... | ...Y.....   | P.....      |
| TN/83-1211 | .....      | L.....     | .....      | .....      | .....      | .D.....     | .....       | ....T..... | ...Y.....   | P.....      |
| TN/84-611  | .....      | L.....     | .....      | .....      | .....      | .D.....     | .....       | ....T..... | ...Y.....   | P.....      |
| TN/85-123  | .....      | .....M..   | .....      | .....      | .....      | .DY.....T.. | .V...V...V  | .....      | .A.....     | P.....L...  |
| TN/85-417  | .....      | .....M..   | .....      | .....      | .....      | .DY.....    | .V...V...V  | .....      | .A..L.....  | P.....L...  |
| TN/89-356  | .....      | .....M..   | .....      | .....      | .....      | .DY.....    | .V...V...V  | .....      | .A..L.....  | P.....L...  |
| TN/89-515  | .....      | .....M..   | .....      | .....      | .....      | .DY.....    | .V...V...V  | .....      | .A.....     | P.....L...  |
| TN/89-1144 | .....      | .....M..   | .....      | .....      | .....      | .DY.A.....  | .V...V...V  | .....      | .A...I...   | P.....L...  |
| TN/89-1259 | .....      | .....M..   | .....      | .....      | .....      | .DY.....    | .V...V...V  | .....      | .A.....     | P.....L...  |
| TN/90-140  | .....      | .....M..   | .....      | .....      | .....      | .DY.....    | .V...V...V  | .....      | .A.....     | P.....L...  |
| TN/90-422  | .....      | .....M..   | .....      | .....      | .....      | .DY.A.....  | .V...V...V  | .....      | .A.....     | P.....L...  |
| TN/90-1031 | .....      | .....M..   | .....      | .....      | .....      | .DY.....    | .V...V...V  | .....      | .A..L.....  | P.....L...  |
| TN/91-316  | .....      | .....M..   | .....      | .....      | .....      | .DY.....    | .V...V...V  | .....      | .A..L.....  | P.....L...  |
| TN/91-320  | .....      | .....M..   | .....      | .....      | .....      | .DY.....    | .VK..V...V  | .....      | .A..L.....  | P.....L...  |
| TN/91-334  | .....      | .....M..   | .....      | .....      | .....      | .DY.....    | .V...V...V  | .....      | .A.....     | P..V..L...  |
| TN/91-349  | .....      | .....M..   | .....      | .....      | .....      | .DY.....    | .VK..V...V  | .....      | .A..L.....  | P.....L...  |
| TN/91-451  | .....      | .....M..   | .....      | .....      | .....      | .DY.....    | .VK..V...V  | .....      | .A..L.....  | P.....L...  |
| TN/91-521  | .....      | .....M..   | .....      | .....      | .....      | .DY.....    | .VK..V...V  | .....      | .A..P.....  | P.....S...  |
| TN/92-1031 | .....      | .....M..   | .....      | .....      | .....      | .DY.....    | .V...V...V  | .....      | .A..L..L..L | P.....L...  |
| TN/92-1120 | .....      | .....M..   | .....      | .....      | .....      | .DY.I.....  | .V...V...VG | .....      | .A..L..L..L | P.....L...  |
| TN/93-32   | .....      | .....M..   | .....      | .....      | .....      | .DY.I.....  | .V...V...VG | .....      | .A..L..L..L | P.....L...  |
| TN/93-413  | .....      | .....M..   | .....      | .....      | .....      | .DY.I.....  | .V...V...V  | .....      | .A..L..L..L | P.....L...  |
| TN/93-616  | .....      | .....M..   | .....      | .....      | .....      | .DY.I.....  | .V...V...VG | .....      | .A..L..L..L | P.....L...  |
| NL/94-1    | .....      | .....M..   | .....      | .....      | .....      | .DY.M.....  | .V...V...V  | .....      | .A..L.....  | P.....LAA   |
| TN/95-111  | .....      | .....M..   | .....      | .....      | .....      | .DY.....    | .V...V...V  | .....      | .A..L..L..L | P.....L...  |
| TN/95-252  | .....      | .....M..   | .....      | .....      | .....      | .DY.I.....  | .V...V...V  | .....A...  | .A..L..L..L | P.....L...  |
| TN/96-35   | .....T     | .....M..   | .....      | .....      | .....      | .DY.I.....  | .V...V...V  | .....      | .A..L..L..L | P.....L...  |
| TN/96-44   | .....      | .....M..   | .....      | .....      | .....      | .DY.I.....  | .V...V...V  | .....      | .A.....     | P.....L...  |
| TN/96-102  | .....      | .....M..   | .....      | .....      | .....      | .DY.....    | .V...V...V  | .....      | .A..L..L..L | P.....L...  |
| TN/96-115  | .....      | .....M..   | .....      | .....      | .....      | .DY.I.....  | .V...V...V  | .....      | .A..L..L..L | P.....L...  |
| TN/96-213  | .....      | .....M..   | .....      | .....      | .....      | .DY.I.....  | .V...V...V  | .....      | .A..L..L..L | P.....L...  |
| TN/96-217  | .....      | .....M..   | .....      | .....      | .....      | .DY.I.....  | .V...V...V  | .....      | .A..L..L..L | P.....L...  |
| TN/96-325  | .....T     | .....M..   | .....      | .....      | .....      | .DY.I.....  | .V...V...V  | .....      | .A..L..L..L | P.....L...  |
| CAN/98-73  | .....      | .....M..   | .....      | .....      | .....      | .DY...K...  | .V...V...V  | .....      | .A..L.....  | P.....L...  |
| TN/99-419  | .....      | .....M..   | .....      | .....S.    | .....      | .DY..S....  | RV...V...V  | .....      | .A..L.....  | P..R...L... |



|            |             |             |             |            |             |             |            |            |              |            |
|------------|-------------|-------------|-------------|------------|-------------|-------------|------------|------------|--------------|------------|
| TN/82-59   | DSTSLAATSE  | DHLHTGTTPT  | PDATVLQOTP  | DENTTPLRRT | NGOTTQTTE   | KKPTGATTKK  | G--TTNQTS  | TAATQTSNTT | NQTRNGKETT   | TTSARSRNDA |
| TN/83-126  | .....       | .....       | .....P..... | ..H...S.   | .....A.I.   | .....       | E--.....   | .....F...  | .....R..A    | .....KD..  |
| TN/83-1211 | .....       | .....       | .....P..... | ..H...S.   | .....A.I.   | .....       | E--.....   | .....F...  | .....R..A    | .....KD..  |
| TN/84-611  | .....       | .....       | .....P..... | ..H...S.   | .....A.I.   | .....       | E--.....   | .....F...  | .....R..A    | .....KD..  |
| TN/85-123  | .....       | .....       | .....S..... | ..H..L.S.  | .....       | .....       | E--..TR..  | .....L...  | .....S..R.A  | .....G.    |
| TN/85-417  | .....       | .....       | .....S..... | ..H..L.P.  | .....       | .....R..... | E--..TR..  | .....L...  | .....S.ER.A  | ...V...G.  |
| TN/89-356  | .....       | .....       | .....S...T  | ..H..L.S.  | ..R.....    | .....       | E--..TR..  | .....L...  | .....S..R.A  | .....S.    |
| TN/89-515  | ...P.....   | .....       | .....S...T  | ..H..L.S.  | ..R.....    | .....       | E--..TR..  | .....L...  | .....S..R.A  | .....G.    |
| TN/89-1144 | ...P.....   | .....       | .....S...T  | ..H...S.   | ..R.....    | .....       | E--..TR..  | .....L...  | .....S..R.A  | .....G.    |
| TN/89-1259 | ...P.....   | .....       | .....S...T  | ..H...S.   | ..R.....    | .....       | E--..TR..  | .....L...  | .....S..R.A  | .....G.    |
| TN/90-140  | ...P.....   | .....       | .....S...T  | ..H...S.   | ..R.....    | .....       | E--..TR..  | .....L...  | .....S..R.A  | .....G.    |
| TN/90-422  | ...P.....   | .....       | .....S...T  | ..H...S.   | ..R.....    | .....       | E--..TR..  | .....L...  | .....S..R.A  | .....G.    |
| TN/90-1031 | .....L.     | .....R..... | .....S...T  | ..H..L.S.  | ..R.....    | .....       | E--..TR..  | .....L...  | .....S..R.A  | .....G.    |
| TN/91-316  | .....       | .....       | .....S...T  | ..H..L.S.  | ..RL.....   | .....       | E--N..TR.. | .....L...  | .....S..R.A  | .....G.    |
| TN/91-320  | .....       | .....       | .....S...T  | ..H..L.S.  | ..R.....    | Q...RT...   | ---..TR..  | .....L...  | .....S..R.AI | .....G.    |
| TN/91-334  | ...P.....   | .....       | .....S...T  | ..H..L.S.  | ..R.....    | .....       | EKEI..TR.. | .....L...  | .....S..R.A  | .....G.    |
| TN/91-349  | .....       | .....       | .....S...T  | ..H..L.S.  | ..R.....    | Q...RT...   | ---..TR..  | .....L...  | ..R.S..R.AI  | .....G.    |
| TN/91-451  | .....       | .....       | .....S...T  | ..H..L.S.  | ..R.....    | Q...RT...   | ---..TR..  | .....L...  | .....S..R.AI | .....G.    |
| TN/91-521  | .....P..... | .....       | .....S...T  | ..H..L.S.  | ..R.....    | ...RT...    | ---..TR..  | .....L...  | .....S..R.AI | .....G.    |
| TN/92-1031 | .....       | .....       | .....IS...T | ..H..L.SI  | ..R.....    | .....       | EKE..TR..  | .....L...  | .....S..R.A  | .....G.    |
| TN/92-1120 | .....       | .....       | .....S...T  | ..H..L.SI  | ..R.....    | .....       | EKE..TR..  | .....L...  | .....S..R.A  | .....G.    |
| TN/93-32   | .....P..... | .....       | .....S...T  | ..H..L.SI  | ..R.....    | .....       | EKE..TR..  | .....L...  | .....S..R.A  | .....G.    |
| TN/93-413  | .....       | .....       | .....S...T  | ..H..L.SI  | ..K.....    | .....       | EKE..TR..  | .....L...  | .....S..R.A  | .....G.    |
| TN/93-616  | .....       | .....       | .....S...T  | ..H..L.SI  | ..R.....    | .....       | EKE..TR..G | .....L...  | .....S..R.A  | .....G.    |
| NL/94-1    | .....       | .....       | .....S...T  | ..Y..L.S.  | ..R.....    | .....       | E--..TR..  | .....L...  | .....SYVR.A  | .....S.    |
| TN/95-111  | .....R..... | .....       | .....S...T  | ..H..L.SI  | ..R.....    | R.....      | EKE..TR..  | .....L...  | .....S..RKA  | .....G.    |
| TN/95-252  | .....I..... | .....       | .....S...A  | E.H..L.SI  | ..K.....    | ...N.....   | EKE..TR..  | .....L...  | .....S..R.AA | .....G.    |
| TN/96-35   | .....P..... | .....       | .....S...A  | ..H..L.SI  | ..R.....    | .....       | EKE..TR..  | .....L...  | .....S..R.AA | .....G.    |
| TN/96-44   | ...P...P.   | ...P.....   | .....S...A  | ..H..L.SI  | ..R.....    | .....       | EKE..TR..  | .....L...  | .....S..R.AA | .....G.    |
| TN/96-102  | .....R..... | .....       | .....S...T  | ..H..L.SI  | ..R.....I.. | R.....      | EKE..TR..  | .....L...  | .....S..R.A  | .....G.    |
| TN/96-115  | .....P..... | .....       | .....S...A  | ..H..L.SI  | ..R.....    | .....       | EKE..TR..  | .....L...  | .....S..R.AA | .....G.    |
| TN/96-213  | .....P..... | .....       | .....S...A  | ..H..L.SI  | ..R.....    | .....       | EKE..TR..  | .....L...  | .....S..R.AA | .....G.    |
| TN/96-217  | .....P..... | .....       | .....S...A  | ..H..L.SI  | ..R.....    | .....       | EKE..TR..  | .....L...  | .....S..R.AA | .....G.    |
| TN/96-325  | .....P..... | .....       | .....S...A  | ..H..L.SI  | ..R.....    | .....       | EKE..TR..  | .....L...  | .....S..R.AA | .....G.    |
| CAN/98-73  | .....L.     | .....       | .....S...T  | ..H..L.S.  | ..R.....A.  | ...R.....   | E--..TR..  | .....L...  | .....S..R.A  | .....N.    |
| TN/99-419  | .....L.     | .....       | .....S...T  | ..H..L.S.  | ..R.....A.  | ...R.....   | E--..TR..  | .....LKA.  | .....S..R.A  | .....N.    |

|            |            |            |            |          |
|------------|------------|------------|------------|----------|
| TN/82-59   | AAQSSKQTTQ | ATDPSSQPHH | TQKSTTTM-- | -----    |
| TN/83-126  | TT...G..A. | .N.G.....  | ARE..AA.-- | -----    |
| TN/83-1211 | TT...G..A. | .N.G.....  | ARE..AA.-- | -----    |
| TN/84-611  | TT...G..A. | .N.G.....  | ARE..AA.-- | -----    |
| TN/85-123  | TT...E.... | .A.....    | .....TWT   | QHRHIFSK |
| TN/85-417  | TT...E.... | .A.....    | A.....TWT  | QHRHIFSK |
| TN/89-356  | TT...N.... | .A.....    | .....      | -----    |
| TN/89-515  | TT...D.... | .A.....R   | .....TWT   | QHRHIFSK |
| TN/89-1144 | TT...D.... | .A.....R   | .....TWT   | QHRHIFSK |
| TN/89-1259 | TT...D.... | .A...P...R | .....TWT   | QHRHIFSK |
| TN/90-140  | TT...D.... | .A.....R   | .....TWT   | QHRHIFSK |
| TN/90-422  | TT...D.... | .A.....R   | .....TWT   | -----    |
| TN/90-1031 | TT.N.D.... | .A.....    | .....TYN   | TDTSSPSS |
| TN/91-316  | TT...D.... | .A.....    | .....TYN   | TDTSSPSS |
| TN/91-320  | .T...D.... | .A.....    | .....TYN   | TDTSSPSS |
| TN/91-334  | TT...D.... | .A.....    | .....T--   | -----    |
| TN/91-349  | .T...D.... | .A.....    | .....TYN   | TDTSSPSS |
| TN/91-451  | .T...D.... | .A.....    | .....TYN   | TDTSSPSS |
| TN/91-521  | .T...D.... | .A.....    | .....TYN   | TDTSSPSS |
| TN/92-1031 | TT.N.D.... | .A.....    | .....TYN   | TDTSSPSS |
| TN/92-1120 | TT.N.D.... | .A.....    | .....TYN   | TDTSSPSS |
| TN/93-32   | TT.N.D.... | .A.....    | .....TYN   | TDTSSPSS |
| TN/93-413  | TT.N.D.... | .A.....    | .....TYN   | TDTSSPSS |
| TN/93-616  | TT.N.D.... | .A.....    | .....TYN   | TDTSSPSS |
| NL/94-1    | TT...D.... | .A.....    | .....TYN   | TDTSSPSS |
| TN/95-111  | TT.N.D.... | .A.....S.. | .....TYN   | TDTSSPSS |
| TN/95-252  | TT.N.D.... | .A.....    | .....TYN   | TDTSSSSS |
| TN/96-35   | TT.N.D.... | .A.....    | .....TYN   | TDTSSPSS |
| TN/96-44   | TT.N.D.... | .A.....    | .....TYN   | TDTSSPSS |
| TN/96-102  | TT.N.D.... | .A.....S.. | .....TYN   | TDTSSPSS |
| TN/96-115  | TT.N.D.... | .A.....    | .....TYN   | TDTSSPSS |
| TN/96-213  | TT.N.D.... | .A....R... | .....TYN   | TDTSSPSS |
| TN/96-217  | TT.N.D.... | .A....R... | .....TYN   | TDTSSPSS |
| TN/96-325  | TT.N.D.... | .A.....    | .....TYN   | TDTSSPSS |
| CAN/98-73  | TT...D.... | .A.....SQ. | .....TYN   | IDTSSPSS |
| TN/99-419  | TT...D.... | TA.....SQ. | .....TYN   | TDTSSPSS |
